# Supplementary material for: Oligonucleotide-capped mesoporous silica nanoparticles as DNA-responsive dye delivery systems for genomic DNA detection
Source: Royal Society of Chemistry journal article supplement (doi:10.1039/c4cc08306g), 2014-11-19
Supplement: c4cc08306g1.pdf [file c4cc08306g1.pdf]

## *Supporting Information*

**General techniques:** Powder X-ray diffraction (PXRD) and thermogravimetric analysis (TGA), elemental analysis, transmission electron microscopy (TEM), N<sub>2</sub> adsorption-desorption, UV-visible (UV-vis) and fluorescence spectroscopy were employed to characterize the synthesized materials. PXRD measurements were performed on a D8 Advance diffractometer using Cu K $\alpha$  radiation (Philips, Amsterdam, The Netherlands). Thermogravimetric analyses were carried out on a TGA/SDTA 851e balance (Mettler Toledo, Columbus, OH, USA), using an oxidizing atmosphere (air, 80 mL min<sup>-1</sup>) with a heating program: gradient of 393-1273 K at 10°C min<sup>-1</sup>, followed by an isothermal heating step at 1273°C for 30 min. TEM images were obtained with a 100 kV CM10 microscope (Philips). N<sub>2</sub> adsorption-desorption isotherms were recorded with an ASAP2010 automated sorption analyzer (Micromeritics, Norcross, GA, USA). The samples were degassed at 120°C in vacuo overnight. The specific surface areas were calculated from the adsorption data in the low pressure range using the Brunauer, Emmett and Teller (BET) model. Pore size was determined following the Barret, Joyner and Halenda (BJH) method. Fluorescence spectroscopy measurements were carried out on a Felix 32 Analysis version 1.2 (Build 56, Photon Technology International, Birmingham, NJ, USA).

**Chemicals:** Tetraethylorthosilicate (TEOS), *n*-cetyltrimethylammoniumbromide (CTAB), NaOH, (3-isocyanatopropyl)triethoxysilane, rhodamine B, tris(hydroxymethyl)aminomethane (TRIS), hydrochloric acid and oligonucleotides **O1** (NH<sub>2</sub>-(CH<sub>2</sub>)<sub>6</sub>-5'-GACTACCAGGGTATC-3') and **O2** (5'-AAGCGTGGGGAGCAAACAGGATTAGATACCCTGGTAGTC-3') were purchased from Sigma-Aldrich Química (Madrid, Spain). All products were used as received.

**Synthesis of MCM-41 mesoporous nanoparticles:** NaOH (2.00 mol L<sup>-1</sup>, 3.5 mL) was added to a solution of CTAB (1.00 g, 2.74 mmol) in deionized H<sub>2</sub>O (480 mL). The solution temperature was

adjusted to 80°C and then TEOS (5.00 mL,  $2.57 \times 10^{-2}$  mol) was added dropwise. The mixture was stirred for 2 h to give a white precipitate. The solid was isolated by centrifugation and washed with deionized H<sub>2</sub>O and EtOH and then dried at 60°C for 12 h to give MCM-41. In order to remove the template phase, MCM-41 was calcined at 550°C using an oxidizing atmosphere.

**Synthesis of S1-I:** In a typical synthesis, calcined MCM-41 (200 mg) and rhodamine B (766.4 mg, 0.16 mmol) were suspended in CH<sub>3</sub>CN (10 mL). The suspension was stirred at room temperature for 24 h. Then an excess of (3-isocyanatopropyl)triethoxysilane (247.6  $\mu$ L, 1.0 mmol) was added, and the final mixture was stirred at room temperature for 5.5 h. The resulting pink solid (**S1-I**) was isolated by centrifugation, washed with CH<sub>3</sub>CN (5 mL) and dried at 38°C for 18 h.

**Synthesis of S1-O1/O2:** A mixture of oligonucleotides **O1** and **O2** (25  $\mu$ L of each in water at 100  $\mu$ M concentration) was heated to 90°C and cooled at 25°C slowly in order to achieve DNA hybridization (formation of **O1/O2**). The DNA mixture solution was added to a suspension containing 1 mg of **S1-I**, 50  $\mu$ L of water, 700  $\mu$ L of a solution of rhodamine B in CH<sub>3</sub>CN (1 mM) and 2  $\mu$ L of triethylamine. Finally, the mixture was stirred for 18 h at 37°C. The resulting solid was isolated by centrifugation and washed with hybridization buffer (20 mM TRIS-HCl, 37.5 mM MgCl<sub>2</sub>, pH 7.5) to eliminate the residual dye and unbounded oligonucleotides (see Figure S1).

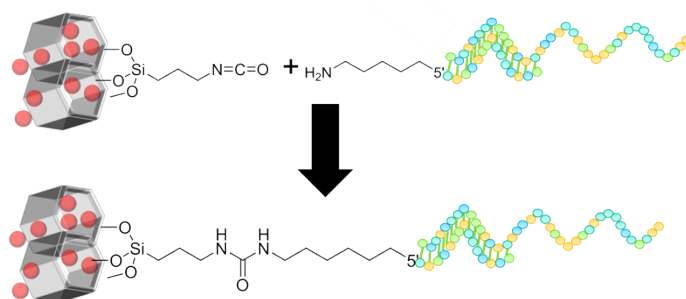

**Figure S1.** Surface functionalization reaction of **S1-I** via urea bond formation with **O1/O2**.

**Characterization of the prepared materials:** The MCM-41 scaffold and the mesoporous solid **S1-I** were characterized following standard techniques, including transmission electron microscopy (TEM), powder X-ray diffraction (PXRD) and N<sub>2</sub> sorption analysis. PXRD pattern of siliceous MCM-41 nanoparticles as synthesized (Figure S2, curve a) showed four low-angle reflections typical of a hexagonal array, indexed as (100), (110), (200), and (210) Bragg peaks. A significant displacement of 3 Å of the (100) peak in the PXRD pattern of the MCM-41 calcined nanoparticles was evident in curve b, related to further condensation of silanol groups during the calcination step. Finally, curve c corresponds to the **S1-I** XRD pattern. An intensity decrease of the (100) peak and a broadening of the (110) and (200) reflections was observed, related to a loss of contrast due to the filling of the pore voids with the rhodamine B dye.

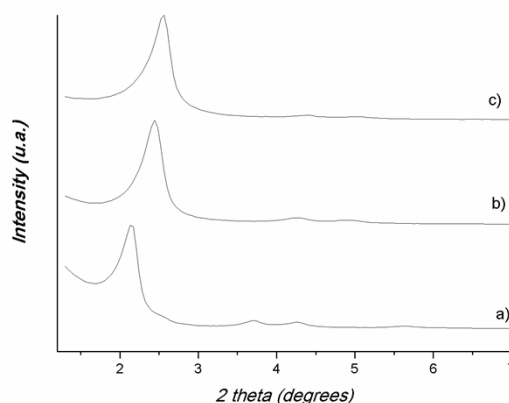

**Figure S2.** Powder X-ray patterns of the solids (a) MCM-41 as synthesized, (b) calcined MCM-41, and (c) solid **S1-I**.

The presence, in the final functionalized solids, of the mesoporous structure was confirmed by TEM analysis, in which the typical channels of the MCM-41 matrix are visualized as alternate black and white stripes (see Figure S3). The figure also shows that the prepared MCM-41 and solid **S1-I** are obtained as spherical particles with diameters ranging from ca. 80 to 120 nm.

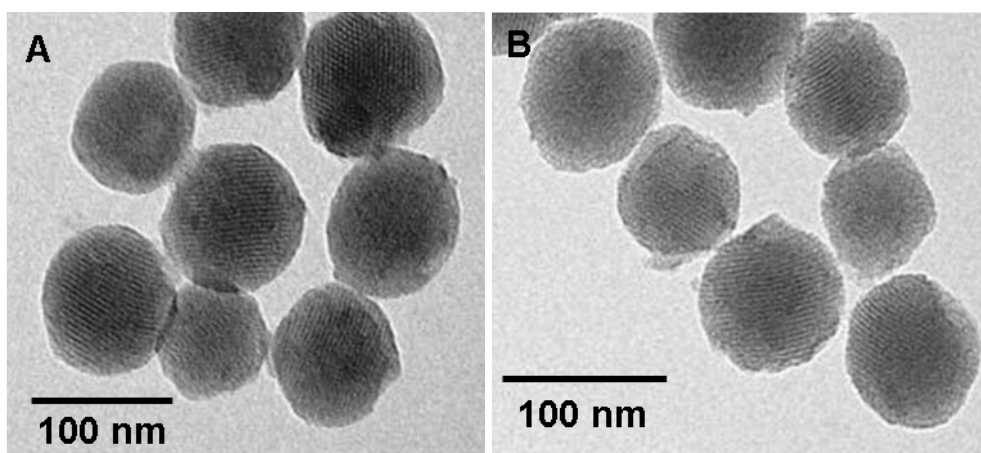

**Figure S3.** TEM images of calcined MCM-41 sample (A) and solid **S1-I** (B) showing the typical porosity of the MCM-41 mesoporous nanoparticles matrix.

The N<sub>2</sub> adsorption–desorption isotherms of the calcined MCM-41 nanoparticles show an adsorption step at an intermediate  $P/P_0$  value (0.1–0.3) typical of this type of solid (see Figure S4, curve a). A total pore volume of 0.93 cm<sup>3</sup> g<sup>−1</sup> was calculated by using the BJH model on the adsorption branch of the isotherm. The application of the BET model resulted in a value for the total specific surface of 1228.2 m<sup>2</sup> g<sup>−1</sup>. From the XRD, porosimetry, and TEM studies a pore diameter of 2.40 nm was determined. The N<sub>2</sub> adsorption–desorption isotherm of **S1-I** (see Figure S4, curve b) is typical of mesoporous systems with filled mesopores, and a significant decrease in the N<sub>2</sub> volume adsorbed (0.34 cm<sup>3</sup> g<sup>−1</sup>) and surface area (524.9 m<sup>2</sup> g<sup>−1</sup>) were observed.

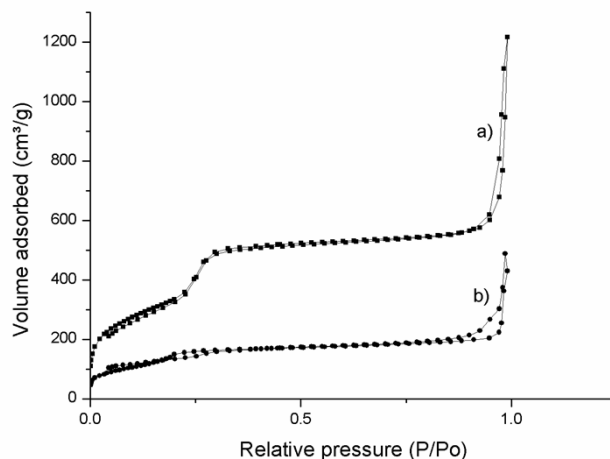

**Figure S4.** N<sub>2</sub> adsorption-desorption isotherms for calcined MCM-41 nanoparticles (a) and **S1-I** material (b).

The content of (3-isocyanatopropyl)triethoxysilane and rhodamine B in the prepared solid **S1-I** was determined by elemental and thermogravimetric analyses (see Table S1). Moreover the diameter of MCM-41, **S1-I** and **S1-O1/O2** solids was measured by dynamic light scattering (DLS) studies (see Figure S5 and Table S2).

**Table S1.** Contents of (3-isocyanatopropyl)triethoxysilane and rhodamine B (in mmol/g solid) in the prepared solid **S1-I**.

|                    | $\alpha_{\text{isocyanate}}$ | $\alpha_{\text{Rhodamine B}}$ | $\alpha_{\text{Organic matter}}$ |
|--------------------|------------------------------|-------------------------------|----------------------------------|
|                    | (%)                          | (%)                           | (%)                              |
| Elemental analysis | 3.99±0.09                    | 17.16±0.11                    | 21.15±0.10                       |
| Thermogravimetry   | -                            | -                             | 26.1±0.2                         |

**Table S2.** Diameter of MCM-41, **S1-I** and **S1-O1/O2** solids measured by DLS.

| Particle diameter (nm) |       |
|------------------------|-------|
| MCM-41                 | 88±2  |
| <b>S1-I</b>            | 114±3 |
| <b>S1-O1/O2</b>        | 154±2 |

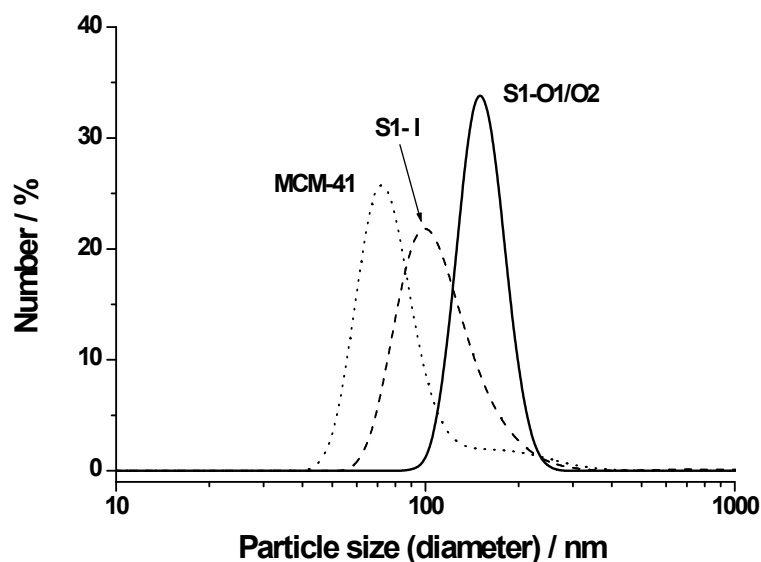

**Figure S5.** Size distribution by number of particles obtained by DLS studies for calcined MCM-41, **S1-I** and **S1-O1/O2** solids.

**Controlled release of solid S1-O1/O2 in the presence of urease and DNase I enzymes:** To confirm the proper anchoring of the double stranded **O1/O2** oligonucleotide, 200  $\mu\text{g}$  of solid **S1-O1/O2** were suspended in 400  $\mu\text{L}$  of the hybridization buffer and separated in 2 aliquots (each of 200  $\mu\text{L}$ ). One of the samples was filled to a final volume of 1000  $\mu\text{L}$  with hybridization buffer whereas the other was filled with the same buffer but containing DNase I enzyme (at a concentration of 10 U/ $\mu\text{L}$ ). Both suspensions were stirred at 25°C for 90 minutes. Aliquots of 150  $\mu\text{L}$  were taken at several times and centrifuged 2 min at 12000 rpm (in order to remove the solid) and the fluorescence of the rhodamine B released measured at 575 nm ( $\lambda_{\text{exc}}$  555 nm). The same experimental procedure was used to study rhodamine B release from solid **S1-O1/O2** in the presence of urease. The obtained results are shown in Figure S6.

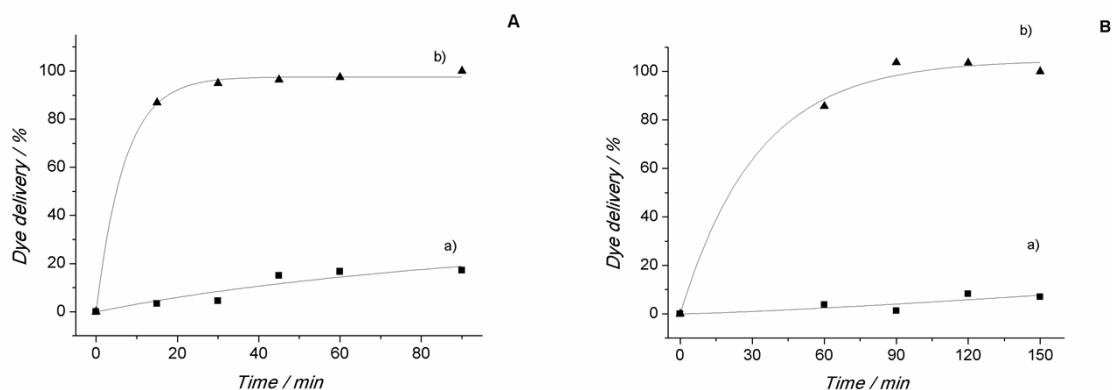

**Figure S6.** A: Delivery of rhodamine B from solid **S1-O1/O2** in the absence (a) and in the presence (b) of DNase I; B: Delivery of rhodamine B from solid **S1-O1/O2** in the absence (a) and in the presence (b) of urease.

**Release experiments of S1-O1/O2:** To investigate the gating properties of **S1-O1/O2**, 200  $\mu\text{g}$  of this solid were suspended in 400  $\mu\text{L}$  of the hybridization buffer and separated in 2 aliquots of 200  $\mu\text{L}$ . Both samples were filled to a volume of 900  $\mu\text{L}$  with hybridization buffer. At the same time a solution of 4000 copies  $\mu\text{L}^{-1}$  of *Mycoplasma fermentans* quantification standard in water was heated to 95°C for 5 min and cooled on ice bath at 0°C for 3 min (in order to dehybridize the double stranded structure). Then, 100  $\mu\text{L}$  of the genome solution was added to one of the **S1-O1/O2** suspensions. Simultaneously 100  $\mu\text{L}$  of water (milliQ grade) with the same thermal treatment were added to the remaining aliquot. Both suspensions were stirred at 25°C for 60 min. Aliquots of 150  $\mu\text{L}$  were taken at several times and centrifuged 2 min at 12000 rpm (in order to remove the solid) and the fluorescence of the rhodamine B released measured at 575 nm ( $\lambda_{\text{exc}}$  555 nm).

**Calibration curve of S1-O1/O2 with *Mycoplasma fermentans* genomic DNA:** In order to carry out these experiments, 120  $\mu\text{L}$  of aqueous solutions containing different number of *Mycoplasma fermentans* DNA copies were heated for 5 min at 95°C, in order to dehybridize DNA. Then, these solutions were left cooling for ca. 3 min in ice bath. These samples were added to several aliquots of 60  $\mu\text{L}$  of **S1-O1/O2** (0.2 mg of solid in 400  $\mu\text{L}$  of hybridization buffer). All samples were stirred at 25°C for 30 min, and after that, were centrifuged 2 min at 12000 rpm in order to remove the solid. The fluorescence of the released

rhodamine B was then measured at 575 nm ( $\lambda_{\text{exc}}$  555 nm). The obtained calibration curve is shown in Figure S7. From this curve the limit of detection (ca. 70 DNA copies  $\mu\text{L}^{-1}$ ) has been calculated based in the intersection point of the two slopes. Moreover a limit of quantification ( $10\sigma$ ) of ca. 150 DNA copies  $\mu\text{L}^{-1}$  has been determined.

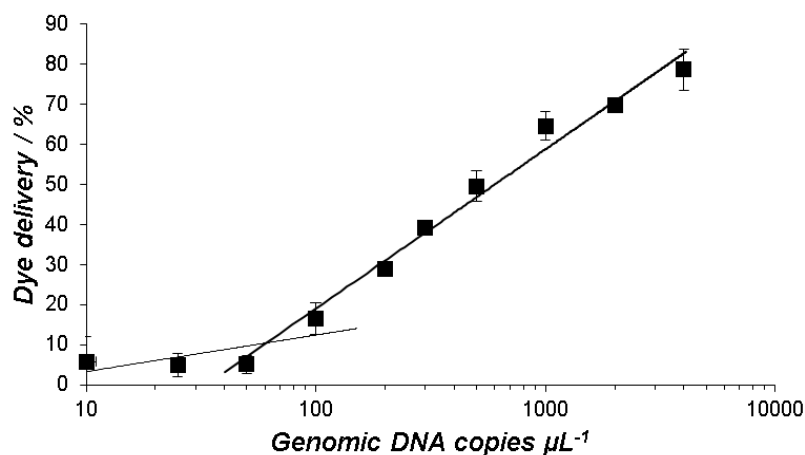

**Figure S7.** Release of rhodamine B from solid **S1-O1/O2** in the presence of different numbers of *Mycoplasma fermentans* genomic DNA copies in Tris-HCl buffer (pH 7.5).

**Selectivity studies with S1-O1/O2:** In order to carry out these experiments, 120  $\mu\text{L}$  of aqueous solutions containing different genome solutions of *Mycoplasma fermentans*, *Candida albicans*, *Legionella pneumophilla*, a mixture of *Candida albicans*-*Legionella pneumophilla* and a mixture of the three genomes (1000 copies  $\mu\text{L}^{-1}$ ) were heated for 5 min at 95°C, in order to dehybridize DNA. As control a 120  $\mu\text{L}$  of hybridization buffer received the same thermal treatment. Then, these samples were left cooling for ca. 3 min in ice bath. These samples were added to several aliquots of 60  $\mu\text{L}$  of **S1-O1/O2** (0.2 mg of solid in 400  $\mu\text{L}$  of hybridization buffer). All samples were stirred at 25°C for 30 min, and after that, samples were centrifuged 2 min at 12000 rpm in order to remove the solid. The fluorescence of the released rhodamine B was then measured at 575 nm ( $\lambda_{\text{exc}}$  555 nm).
